# Supplementary material for: Development of the full-length cDNA clones of two porcine epidemic diarrhea disease virus isolates with different virulence
Source: PLoS One. 2017 Mar 16;12(3):e0173998. doi: 10.1371/journal.pone.0173998 (PMC5354467; doi:10.1371/journal.pone.0173998)
Supplement: S1 Table — (XLSX) [file pone.0173998.s002.xlsx]

## Sheet: Sheet1
S1 Table. Primer list for construciton of PEDV infectious cDNA clone
BJ-2011-C	Sequence 5'→3'	Rlative position in BJ2011C genome	Purpose
NARI-FSEI-CMV-F	GAGGCGCCGGCCGGCCACTAGTTATTAATAGTAATCAATTACG	nt 19-43 corresponds to nt 1-25 of CMV promoter	to generate fragment A
CMV-BJ2011C-R	CTAACTATCCGTAGATAGAAAATCTTTTTAAGTCGGTTCACTAAACGAGCTCTGC	nt 1-33 corresponds to nt 1-33 of BJ2011C; nt 34-55 corresponds to nt 561-582 of CMV promoter	to generate fragment A
CMV-BJ2011C-F	GGGAGGTCTATATAAGCAGAGCTCGTTTAGTGAACCGACTTAAAAAGATTTTCTATC	nt 1-37 corresponds to nt 546-582 of the CMV promoter; nt 38-57 corresponds to nt 1 -20 of BJ2011C	to generate fragment A
2806-MLUI-R	GGCCCTCTTAATTAAATTACGCGTGGTACAACAGGGTG	2792-2811	to generate fragment A
2806-MLUI-F	GTGTTCACCCTGTTGTACCACGCGT	2787-2811	to generate fragment B
6808-MLUI-R	CATGCTTAAGGAACATCAATACGCGT	6808-6833	to generate fragment B
6808-MLUI-F	GCCAATGGCCGGCCAATACGCGTATTGATGTTCCTTA	6808-6827	to generate fragment C
13013-PACI-R	CGCGGAAGGGCCCTCTTAATTAAAATGCTCTTAAGAAC	12994 -13016	to generate fragment C
13013-PACI-F	GTTCTTAAGAGCATTTTAATTAA	12994-13013	to generate fragment D
21039-APAI-R	CTGTGAATTACCGCGGAAGGGCCCAATGTTTTAATGCTAG	21019-21040	to generate fragment D
21039-APAI-F	CCTAGCATTAAAACATTGGGCCC	21019-21040	to generate fragment E
26894-SACII-R	CCACGATTCTGTGAATTACCGCGG	26891-26914	to generate fragment E
26894-SACII-F	TAATTAAGAGGGCCCTTCCGCGGTAATTCACAGAATCG	26891-26911	to generate BJ2011C part of fragment F
End-PolyA-R	TTTTTTTTTTTTTTTTTTTTTTTTTTTTGTGTATCCATATCAACACCGTC	28017 -28038	to generate BJ2011C part of fragment F;
PolyA-HDV-F	AAAAAAAAAAAAAAAAAAAAAAAAAAAAGGGTCGGCATGGCATCTCCACCTC	nt 29-52 corresponds to 5' end of HDV-RZ sequence	to generate HDV-RZ and BGH of Fragment F;
BGH-ASCI-SPHI-R	GTGGATCCAAGGCGCGCCTGCATGCCTGCTATTGTCTTCCCAATC	nt 19-45 corresponds to nt 265-291 of BGH	to generate HDV-RZ and BGH of Fragment F
MCS linker-2	CGCCAATGGCCGGCCAATACGCGTAATtTTAATTAAGAGGGCCCTTCCGCGGATAGGCGCGCCAATGCATG	Corresponding to MCS: -NARI-FSEI-MLUI-PACI-APAI-SACII-ASCI-SPHI-	to create shuttle plasmid pBAC-I
CHM2013	Sequence 5'→3'	Rlative position in CHM2013 genome	Use
NARI-FSEI-CMV-F	GAGGCGCCGGCCGGCCACTAGTTATTAATAGTAATCAATTACG	nt 19-43 corresponds to nt 1-25 of CMV promoter	to generate fragment A
CMV-CHM2013-R	CTAACTATCCGTAGATAGAAAATCTTTTTAAGTCGGTTCACTAAACGAGCTCTGC	nt 1-33 corresponds to nt 1-33 of CHM2013; nt 34-55 corresponds to nt 561-582 of CMV promoter	to generate fragment A
CMV-CHM2013-F	GGGAGGTCTATATAAGCAGAGCTCGTTTAGTGAACCGACTTAAAAAGATTTTCTATC	nt 1-37 corresponds to nt 546-582 of CMV promoter; nt 38-57 corresponds to nt 1-20 of CHM2013	to generate fragment A
1809-SACII-R	CCTAGGATTACGCGTATCCGCGGGCTTTTGCCTTGAC	nt 18-37 corresponds to nt 1795-1814 of CHM2013; nt 1-23 corresponds to vector's homologous arm sequence	to generate fragment A
1809-SACII-F	CTTGTCAAGGCAAAAGCCCGCGG	1792-1814	to generate fragment B
6801-MLUI-R	GCTTAATGAACATCAATACGCGT	6801-6823	to generate fragment B
6801-MLUI-F	GGCAAAAGCCCGCGGATACGCGTATTGATGTTCATTAAG	6801-6822	to generate fragment C
9495-AVRII-R	CTTCGAAAAGGGCCCTCCCTAGGAAAACATTCCCAG	9482-9500	to generate fragment C
9495-AVRII-F	TCATCTGGGAATGTTTTCCTAGG	9478-9500	to generate fragment D
16878-AVRII-R	GAAAACAGCCTTTGACCACCTAGG	16878-16901	to generate fragment D
16878-AVRII-F	TCATCTGGGAATGTTTTCCTAGGTGGTCAAAGGCTGT	16878-16897	to generate fragment E;
21032-APAI-R	CTTTGAGGTCACGTTCCTTCGAAAAGGGCCCAATGTTTTATTATCG	21013-21033	to generate fragment E;
21032-APAI-F	CCCGATAATAAAACATTGGGCCC	21011-21033	to generate fragment F
27142-APAI-R	CTTTGAGGTCACGTTCCTTCGAA	27141-27163	to generate fragment F
27142-BSTBI-F	CCTAGGGAGGGCCCTTTTCGAAGGAACGTGACCTCAA	27141-27161	to generate fragment G
End-PolyA-R	TTTTTTTTTTTTTTTTTTTTTTTTTTTTGTGTATCCATATCAACACCGTC	27973 -27994	to generate fragment G
PolyA-HDV-F	AAAAAAAAAAAAAAAAAAAAAAAAAAAAGGGTCGGCATGGCATCTCCACCTC	nt 29-52 corresponds to 5' end of HDV-RZ sequence	to generate fragment G
BGH-ASCI-SPHI-R	GTGGATCCAAGGCGCGCCTGCATGCCTGCTATTGTCTTCCCAATC	nt 19-45 corresponds to nt 265-291 of BGH	to generate Fragment G
MCS linker-2	CGCCAATGGCCGGCCAATCCGCGGATACGCGTAATCCTAGGGAGGGCCCttTTCGAAATAGGCGCGCCAATGCATG	Corresponding to MCS: -NARI-FSEI-SACII-AVRII-APAI-BSTBI-ASCI-SPHI-	to create shuttle plasmid pBAC-II
Note: Forward primers are indicated with F after the designator, and reverse primers are followed by R.

## Sheet: Sheet2
NARI-FSEI-CMV-F	GGAGAAAATACCGCATCAGGCGCCAATTGGCCGGCCTTGGCATTGATTATTGACTAG
CMV-CHM2013-R	CTAACTATCCGTAGATAGAAAATCTTTTTAAGTCGGTTCACTAAACGAGCTCTGC
CMV-CHM2013-F	GGGAGGTCTATATAAGCAGAGCTCGTTTAGTGAACCGACTTAAAAAGATTTTCTATC
1809-SACII-R	CCTAGGATTACGCGTATCCGCGGGCTTTTGCCTTGAC
1809-SACII-F	CTTGTCAAGGCAAAAGCCCGCGG
6801-MLUI-R	GCTTAATGAACATCAATACGCGT
6801-MLUI-F	GGCAAAAGCCCGCGGATACGCGTATTGATGTTCATTAAG
9495-AVRII-R	cTTCGAAaaGGGCCCtcCCTAGGcctaggaaaacattcccag
9495-AVRII-F	TCATCTGGGAATGTTTTCCTAGG
16878-AVRII-R	GAAAACAGCCTTTGACCACCTAGG
16878-AVRII-F	TCATCTGGGAATGTTTTCCTAGG
21032-APAI-R	CTTTGAGGTCACGTTCCTTCGAAAAGGGCCCAATGTTTTATTATCG
21032-APAI-F	CCCGATAATAAAACATTGGGCCC
27142-APAI-R	CTTTGAGGTCACGTTCCTTCGAA
27142-BSTBI-F	CCTAGGGAGGGCCCTTTTCGAAGGAACGTGACCTCAA
bgh-asc-sph-R	ATAGAATACTCAAGCTTGCATGCAAGGCGCGCCTGCATGCCTGCTATTGTCTTCCC
PolyA-HDV-F	AAAAAAAAAAAAAAAAAAAAAAAAAAAAGGGTCGGCATGGCATCTCCACCTC
end-PolyA-R	TTTTTTTTTTTTTTTTTTTTTTTTTTTTACACCGTCAGGTCTTCAGTTAC
CHM-MCLONE-F	CGCCaatGGCCGGCCaatCCGCGGatACGCGTaatCCTAGGgaGGGCCCttTTCGAAataGGCGCGCCaatGCATG
CHM-MCLONE-R	CattGGCGCGCCtatTTCGAAaaGGGCCCtcCCTAGGattACGCGTatCCGCGGattGGCCGGCCattGG
